# Supplementary material for: Calcium oxalate in the bark of stone birch (Betula ermanii): morphology, age trends, and biomineralization dynamics under salt stress in mud volcanic environments
Source: Research Square preprint supplement (doi:10.21203/rs.3.rs-4549547/v1), 2024-08-15
Supplement: Supplementary file 1 [file cfebda1b87b3e74af2a7d4a2.docx]

**Dictionary of mineralogical terms**, after: Butler (1918)

**Mineral (or mineral species):** solid naturally occurring inorganic substance with a quite well defined chemical composition and a specific crystal structure.

**Crystal**: polyhedral crystalline substance bounded, wholly or partially, by natural surfaces called faces.

**Crystal morphology/habit/form**: external shape of an individual crystal formed by a group of faces. The real crystal habit depends on its crystallography and growth conditions and can become irregular as a result of confined growth in the crystallization medium (commonly rocks).

• Platy/tabular crystals: flat, tablet-shaped crystals, commonly faceted by pinnacoidal faces;

• Prismatic crystals: elongate, prism-shaped crystals;

• Acicular crystals: needle-like, slender, and end-tapered crystals.

**Crystal face**: (1) one of several flat or plane exterior surfaces of a crystal.

(2) planar surface developed on a crystal during its growth. Crystal faces tend to parallel planes of high lattice-point density (Bravais' law), whereby they make rational intercepts with crystallographic axes and may be assigned rational indices, e.g., (hkl).

**Single crystal**: crystal occupying whole grain volume and consisting of a noninterrupted repetition of the crystal lattice in three dimensions.

**Crystal twinning**: two or more separate adjacent crystals of the same mineral sharing symmetrically the same crystal lattice points and thus intergrown (tightly bonded to each other).

• Contact twins: two crystals sharing a single composition plane, often mirror-like across the boundary.

• Penetration twins: separate crystal symmetrically passing through one another.

**Polycrystalline aggregates**: multiple symmetrically or randomly oriented intergrown crystals, sometimes granular or crystalline masses, with distinct faces or edges in every crystal/grain.

**Spherulitic aggregate (spherulites)**: spherical mass of fibrous, needle-like (acicular), or elongated crystals radiating from a single center.

**Druse**: aggregate of randomly oriented faceted crystals growing on a shared base.

**Seed crystal/particle**: fine single crystal or polycrystalline material from which a larger crystal of typically the same material is grown. Crystals can also nucleate and grow on any inorganic or organic seed.

**Nucleation**: first step in the formation of either a new thermodynamic phase or structure via self-assembly or self-organization within a substance or a mixture.

Butler GM (1918) A manual of geometrical crystallography, treating solely of those portions of the subject useful in the identification of minerals. John Wiley & sons, Incorporated
